# Supplementary material
Source: PubMed Central journal article supplement (PMC3337721)
Supplement: NIHMS246370-supplement-01.pdf [file NIHMS246370-supplement-01.pdf]

Figure S1

**A**

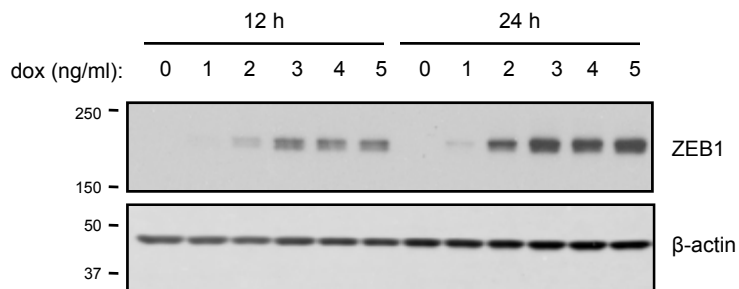

**B**

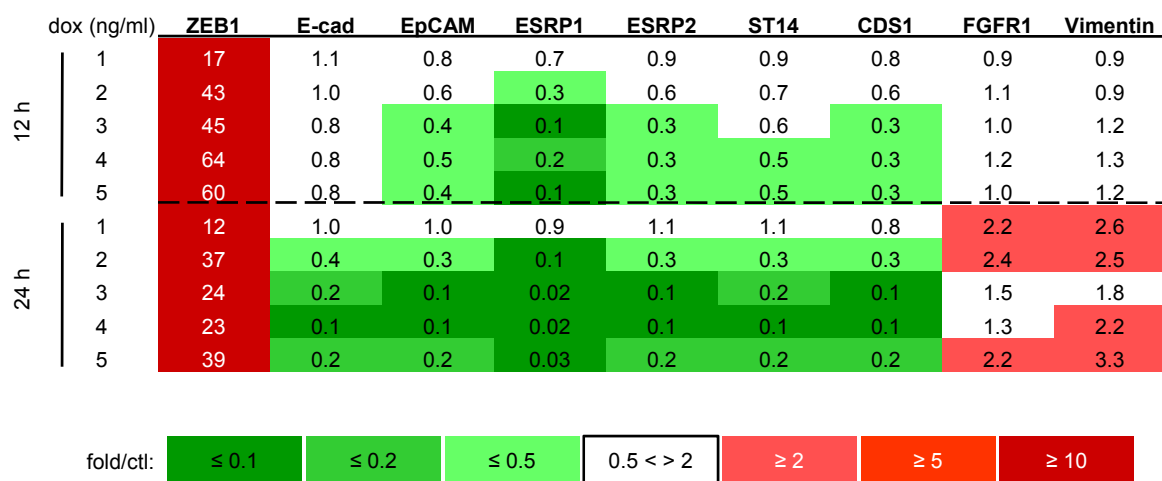

Figure S2

H358 - ctl

H358 - ZEB1

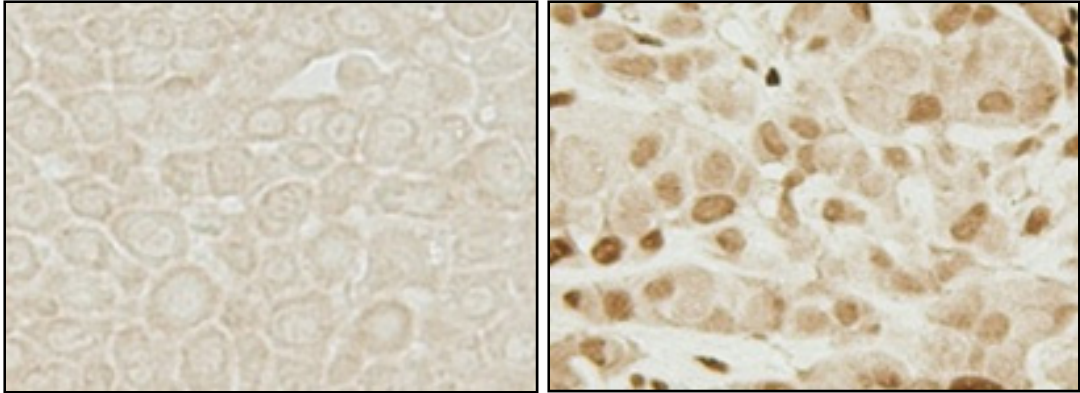

50 µm

**Table S1.** DNA primer sequences for quantitative real-time RT-PCR

| <b>Gene</b>       | <b>Forward Primer (5' to 3')</b> | <b>Reverse Primer (5' to 3')</b> |
|-------------------|----------------------------------|----------------------------------|
| EPCAM             | CGCAGCTCAGGAAGAATGTG             | TGAAGTACACTGGCATTGACGA           |
| CDS1              | TCCTCAGATAGAACCCCTGAGATTC        | GTATCCACCAGTTTTTCCACCTTG         |
| ESRP1             | TCCTGCTGTTCTGGAAAGTCG            | TCCGGTCTAACTAGCACTTCGTG          |
| ST14              | GGGACACACCCAGTATGGAGG            | GAGGTTCTCGCAGGTGGTCTG            |
| ESRP2             | GGGTCTGGGAAGTCAAGACAATG          | CTTCGAAAACAATTGACTGCTGG          |
| CDH1 (E-cadherin) | CGGGAATGCAGTTGAGGATC             | AGGATGGTGTAAAGCGATGGC            |
| VIM               | TTTGAAGAAACTCCACGAAGAGGA         | CCACATCGATTTGGACATGCT            |
| FGFR1             | TCAATGTTTCAGCTTGCCCA             | ACCAAGTCCAAATGGCAAGG             |
| SIRT1             | AGCAGATTAGTAGGCGGCTTGA           | TCAGCGCCATGGAAAATGTAA            |
| ZEB1              | AGCAGTGAAAGAGAAGGGAATGC          | GGTCCTCTTCAGGTGCCTCAG            |
| ZEB2              | AGGCATATGGTGACGCACAA             | CTTGAAC TTGCGGTTACCTGC           |
| SNAIL             | CGCGCTCTTTCCTCGTCAG              | TCCCAGATGAGCATTGGCAG             |
| SLUG              | AATATGTGAGCCTGGGCGC              | CTCTGTTGCAGTGAGGGCAAG            |
| CDH2 (N-cadherin) | TGTGGGAATCCGACGAATG              | GTCATATGGTGGAGCTGTGGG            |

**Table S4.** DNA primer sequences for quantitative real-time RT-PCR

| Affym. ID   | Spearman R value <sup>1</sup> |              |              |       |       | TWIST1 Symbol | Study  | Genes proposed as markers in NSCLC                                                      |
|-------------|-------------------------------|--------------|--------------|-------|-------|---------------|--------|-----------------------------------------------------------------------------------------|
|             | ZEB1                          | ZEB2         | SNAIL        | SLUG  |       |               |        |                                                                                         |
| 202489_s_at | <b>-0.76</b>                  | <b>-0.54</b> | -0.26        | 0.28  | -0.10 | FXYD3         | (6)    | FXYD domain containing ion transport regulator 3                                        |
| 204855_at   | <b>-0.71</b>                  | -0.50        | -0.25        | 0.48  | 0.01  | SERPINB5      | (2)    | serpin peptidase inhibitor, clade B (ovalbumin), member 5                               |
| 203453_at   | <b>-0.71</b>                  | <b>-0.63</b> | -0.35        | 0.05  | -0.11 | SCNN1A        | (5)    | sodium channel, nonvoltage-gated 1 alpha                                                |
| 226213_at   | <b>-0.60</b>                  | -0.39        | 0.04         | -0.12 | -0.30 | ERBB3         | (8, 4) | v-erb-b2 erythroblastic leukemia viral oncogene homolog 3 (avian)                       |
| 205455_at   | <b>-0.60</b>                  | -0.44        | -0.12        | 0.11  | -0.04 | MST1R         | (6)    | macrophage stimulating 1 receptor (c-met-related tyrosine kinase) RON                   |
| 204891_s_at | <b>-0.56</b>                  | -0.35        | -0.02        | 0.28  | -0.05 | LCK           | (8, 4) | lymphocyte-specific protein tyrosine kinase                                             |
| 201250_s_at | <b>-0.56</b>                  | -0.37        | -0.17        | 0.21  | -0.10 | SLC2A1        | (6)    | solute carrier family 2 (facilitated glucose transporter), member 1                     |
| 207388_s_at | -0.42                         | -0.23        | -0.06        | 0.29  | -0.03 | PTGES         | (5)    | prostaglandin E synthase                                                                |
| 204351_at   | -0.42                         | -0.41        | -0.11        | -0.07 | -0.51 | S100P         | (6)    | S100 calcium binding protein P                                                          |
| 201150_s_at | -0.39                         | -0.25        | 0.07         | 0.35  | 0.16  | TIMP3         | (3)    | TIMP metalloproteinase inhibitor 3                                                      |
| 200872_at   | -0.38                         | -0.14        | -0.19        | 0.28  | 0.07  | S100A10       | (3)    | S100 calcium binding protein A10                                                        |
| 218498_s_at | -0.33                         | -0.18        | 0.25         | -0.15 | -0.32 | ERO1L         | (5)    | ERO1-like ( <i>S. cerevisiae</i> )                                                      |
| 234883_x_at | -0.30                         | -0.21        | -0.24        | 0.18  | 0.19  | TRBV7-3       | (6)    | T cell receptor beta variable 7-3                                                       |
| 230378_at   | -0.22                         | -0.01        | 0.25         | 0.31  | -0.24 | SCGB3A1       | (2)    | secretoglobin, family 3A, member 1                                                      |
| 208893_s_at | -0.21                         | -0.29        | 0.21         | -0.03 | -0.27 | DUSP6         | (4)    | dual specificity phosphatase 6                                                          |
| 202414_at   | -0.18                         | 0.02         | <b>-0.68</b> | 0.24  | 0.51  | ERCC5         | (1)    | excision repair cross-complementing rodent repair deficiency, complementation group 5   |
| 204135_at   | -0.15                         | 0.04         | 0.14         | 0.41  | 0.07  | FILIP1L       | (3)    | filamin A interacting protein 1-like                                                    |
| 207011_s_at | -0.15                         | -0.01        | -0.17        | -0.03 | 0.37  | PTK7          | (5)    | PTK7 protein tyrosine kinase 7                                                          |
| 200989_at   | -0.12                         | -0.15        | 0.07         | 0.11  | -0.19 | HIF1A         | (7, 3) | hypoxia inducible factor 1, alpha subunit (basic helix-loop-helix transcription factor) |
| 38707_r_at  | -0.11                         | -0.20        | <b>0.57</b>  | -0.21 | -0.47 | E2F4          | (2)    | E2F transcription factor 4, p107/p130-binding                                           |
| 212724_at   | -0.09                         | -0.16        | 0.02         | 0.24  | 0.05  | RND3          | (8)    | Rho family GTPase 3                                                                     |
| 201655_s_at | -0.08                         | 0.13         | -0.14        | 0.11  | 0.35  | HSPG2         | (2)    | heparan sulfate proteoglycan 2                                                          |
| 206337_at   | -0.07                         | -0.10        | 0.39         | -0.06 | -0.42 | CCR7          | (7)    | chemokine (C-C motif) receptor 7                                                        |
| 204778_x_at | -0.05                         | 0.17         | -0.22        | 0.21  | 0.18  | HOXB7         | (2)    | homeobox B7                                                                             |
| 204026_s_at | -0.02                         | -0.07        | -0.28        | 0.02  | 0.36  | ZWINT         | (5)    | ZW10 interactor                                                                         |
| 203414_at   | -0.02                         | -0.05        | 0.21         | -0.03 | -0.27 | MMD           | (4)    | monocyte to macrophage differentiation-associated                                       |
| 220454_s_at | 0.01                          | -0.05        | 0.33         | -0.35 | -0.41 | SEMA6A        | (3)    | sema domain, transmembrane domain (TM), and cytoplasmic domain, (semaphorin) 6A         |
| 212249_at   | 0.02                          | 0.02         | -0.14        | -0.40 | -0.38 | PIK3R1        | (3)    | phosphoinositide-3-kinase, regulatory subunit 1 (alpha)                                 |
| 2028_s_at   | 0.07                          | 0.02         | 0.44         | 0.04  | -0.02 | E2F1          | (2)    | E2F transcription factor 1                                                              |
| 212884_x_at | 0.08                          | 0.15         | 0.30         | 0.07  | 0.15  | APOE          | (6)    | apolipoprotein E                                                                        |
| 201168_x_at | 0.08                          | 0.18         | 0.29         | 0.15  | -0.09 | ARHGDI A      | (3)    | Rho GDP dissociation inhibitor (GDI) alpha                                              |
| 225439_at   | 0.08                          | 0.06         | -0.20        | 0.33  | 0.50  | NUDCD1        | (2)    | NudC domain containing 1                                                                |
| 212801_at   | 0.12                          | 0.05         | -0.21        | -0.11 | 0.25  | CIT           | (5, 3) | citron (rho-interacting, serine/threonine kinase 21)                                    |
| 201890_at   | 0.12                          | 0.16         | 0.13         | 0.13  | -0.03 | RRM2          | (2)    | ribonucleotide reductase M2 polypeptide                                                 |
| 219671_at   | 0.14                          | -0.01        | 0.44         | -0.23 | -0.23 | HPCAL4        | (3)    | hippocalcin like 4                                                                      |
| 202459_s_at | 0.14                          | 0.02         | 0.29         | -0.32 | -0.21 | LPIN2         | (6)    | lipin 2                                                                                 |
| 201071_x_at | 0.15                          | 0.13         | -0.45        | -0.21 | 0.09  | SF3B1         | (2)    | splicing factor 3b, subunit 1, 155kDa                                                   |
| 221455_s_at | 0.21                          | 0.16         | -0.01        | 0.38  | 0.29  | WNT3          | (8)    | wingless-type MMTV integration site family, member 3                                    |
| 201069_at   | 0.21                          | 0.33         | 0.16         | 0.42  | 0.43  | MMP2          | (3)    | matrix metalloproteinase 2 (gelatinase A, 72kDa gelatinase, 72kDa type IV collagenase)  |
| 211851_x_at | 0.23                          | 0.17         | 0.14         | -0.08 | 0.05  | BRCA1         | (1)    | breast cancer 1, early onset                                                            |
| 238977_at   | 0.23                          | 0.18         | 0.28         | -0.07 | -0.21 | MCM6          | (2)    | minichromosome maintenance complex component 6                                          |
| 204729_s_at | 0.24                          | 0.06         | 0.30         | 0.02  | -0.32 | STX1A         | (7)    | syntaxin 1A (brain)                                                                     |
| 203089_s_at | 0.28                          | 0.15         | 0.19         | -0.24 | -0.18 | HTRA2         | (3)    | HtrA serine peptidase 2                                                                 |
| 209969_s_at | 0.44                          | 0.42         | 0.02         | -0.07 | 0.07  | STAT1         | (4)    | signal transducer and activator of transcription 1, 91kDa                               |
| 228131_at   | 0.48                          | 0.49         | -0.19        | -0.12 | 0.41  | ERCC1         | (1)    | excision repair cross-complementing rodent repair deficiency, complementation group 1   |

<sup>1</sup> Significant R values are bolded and italicized. Genes of interest are highlighted in blue.
